# Supplementary material
Source: PubMed Central journal article supplement (PMC6645321)
Supplement: ao7b01039_si_001.pdf [file ao7b01039_si_001.pdf]

# **Natural indices for the chemical hardness / softness of metal cations and ligands**

Huifang Xu<sup>1, \*</sup>, David C. Xu<sup>1</sup>, and Yifeng Wang<sup>2</sup>

<sup>1</sup> *NASA Astrobiology Institute, Department of Geoscience, University of Wisconsin - Madison, Madison, Wisconsin 53706, USA*

<sup>2</sup> *Sandia National Laboratories, P. O. Box 5800, Mail Stop 0776, Albuquerque, NM 87185, USA*

Corresponding author: Prof. Huifang Xu

Department of Geoscience

University of Wisconsin - Madison

Madison, Wisconsin 53706

1215 West Dayton Street

A 352 Weeks Hall

Tel: 608-265-5887

FAX: 608-262-0693

E-mail: [hfxu@geology.wisc.edu](mailto:hfxu@geology.wisc.edu)

Table S1 Ionic radii, solvation energies, Gibbs free energy of formation of divalent cations, and stability constants for  $M^{2+}$ —humic acid and  $M^{2+}$ —fulvic acid complexes.

| $M^{2+}$        | $r_{M^{2+}}$<br>(Å) | $\Delta G_s$<br>$M^{2+}_{(aq)}$ | $\Delta G_f$<br>$M^{2+}_{(aq)}$ | $\log K_{ML}$        |                                  |                       |                                   |                     |                           |                 |                             |
|-----------------|---------------------|---------------------------------|---------------------------------|----------------------|----------------------------------|-----------------------|-----------------------------------|---------------------|---------------------------|-----------------|-----------------------------|
|                 |                     |                                 |                                 | Humic acid<br>(Exp.) | Humic acid<br>(Calc. $\pm$ 0.37) | Fulvic acid<br>(Exp.) | Fulvic acid<br>(Calc. $\pm$ 0.40) | ATP<br>(Exp.)       | ATP<br>(Calc. $\pm$ 0.28) | H-ATP<br>(Exp.) | H-ATP<br>(Calc. $\pm$ 0.18) |
| Pt              | 0.80                | -141.87                         | 54.80                           |                      | 8.53                             |                       | 4.38                              |                     | 5.73                      |                 | 3.83                        |
| Pd              | 0.80                | -141.87                         | 42.49                           |                      | 8.27                             |                       | 4.26                              |                     | 5.58                      |                 | 3.91                        |
| Hg              | 1.02                | -119.71                         | 39.36                           |                      | 8.25                             |                       | 4.46                              |                     | 3.66                      |                 | 4.90                        |
|                 | 0.73                | -144.83                         | 15.55                           |                      | 6.41                             | 4.70                  | 4.26                              | 6.13;<br><b>6.0</b> | 5.52                      | 3.52            | 3.86                        |
| Cu              |                     |                                 |                                 |                      |                                  |                       |                                   |                     |                           |                 |                             |
| Pb              | 1.18                | -107.89                         | -5.79                           | 8.70                 | 8.68                             | 3.60                  | 3.84                              |                     | 5.59                      |                 | 3.67                        |
| Sn              | 1.11                | -112.91                         | -6.63                           |                      | 8.02                             |                       | 3.93                              |                     | 5.22                      |                 | 4.02                        |
| Ni              | 0.70                | -147.75                         | -10.90                          | 5.78                 | 5.82                             | 4.50                  | 3.98                              | 5.02                | 5.14                      | 4.23            | 4.06                        |
| Co              | 0.74                | -144.35                         | -13.00                          | 5.20                 | 5.82                             | 4.30                  | 3.99                              | 4.63                | 5.17                      | 4.19            | 4.05                        |
| Cd              | 0.95                | -125.31                         | -18.57                          | 6.90                 | 6.57                             |                       | 3.95                              | 3.54                | 3.61                      | 5.04            | 4.92                        |
| Fe              | 0.77                | -141.04                         | -21.87                          |                      | 5.71                             |                       | 3.92                              |                     | 5.21                      |                 | 4.10                        |
| Zn              | 0.75                | -143.30                         | -35.17                          | 5.73                 | 5.35                             | 3.20                  | 3.79                              |                     | 3.49                      |                 | 5.04                        |
| Mn              | 0.82                | -136.46                         | -55.20                          | 5.00                 | 5.17                             | 3.95                  | 3.62                              | 3.77                | 3.76                      | 4.69            | 4.79                        |
| Be              | 0.45                | -175.02                         | -89.80                          |                      | 4.79                             |                       | 2.79                              | 4.06                | 3.93                      | 4.55            | 4.69                        |
| Mg              | 0.72                | -145.80                         | -108.83                         | 4.10                 | 3.80                             | 2.70                  | 2.30                              | 4.76                | 4.72                      | 4.14            | 4.27                        |
| Eu              | 1.17                | -108.59                         | -129.10                         |                      | 6.01                             |                       | 2.66                              | 3.29                | 3.29                      | 5.09            | 5.19                        |
| Ca              | 1.00                | -121.28                         | -132.12                         | 4.22                 | 4.20                             | 3.60                  | 2.82                              | 4.85                | 4.91                      | 4.35            | 4.18                        |
| Ba              | 1.36                | -95.99                          | -132.73                         |                      | 8.03                             |                       | 2.29                              |                     | 5.28                      |                 | 4.03                        |
| Sr              | 1.16                | -109.30                         | -133.72                         |                      | 5.82                             |                       | 2.63                              |                     | 5.10                      |                 | 4.08                        |
| Ra              | 1.39                | -94.14                          | -134.20                         |                      | 8.37                             |                       | 2.21                              |                     | 3.21                      |                 | 5.25                        |
| UO <sub>2</sub> | 0.75                | -142.54                         | -227.70                         |                      | 1.37                             |                       | 1.92                              |                     | 2.47                      |                 | 5.45                        |

ATP = Adenosine-5'-triphosphate; H-ATP = protonated ATP that forms metal complexes in M-HL form.

Note: Radii of the cations are from references of <sup>15</sup>. The values of *log K* metal—complexes for ATP and H-ATP in ionic strength of 0.1 are from reference <sup>17</sup>. M—humates data are from <sup>20</sup> and <sup>33</sup>. Cu(II)—humate is not used because it is pH-dependent and related to the formation of polynuclear complexes (i.e., both ML and ML<sub>2</sub> complexes) <sup>34</sup>. The data for M—fulvic acid complexes are from Schnitzer and colleagues <sup>35-37</sup>. There are two reported values for Cu-fulvic acid complex. The values of  $\Delta G_f$  of the cations are from references <sup>12, 16, 18</sup>, except for Pt<sup>2+</sup>, Pd<sup>2+</sup> from reference <sup>24</sup>.

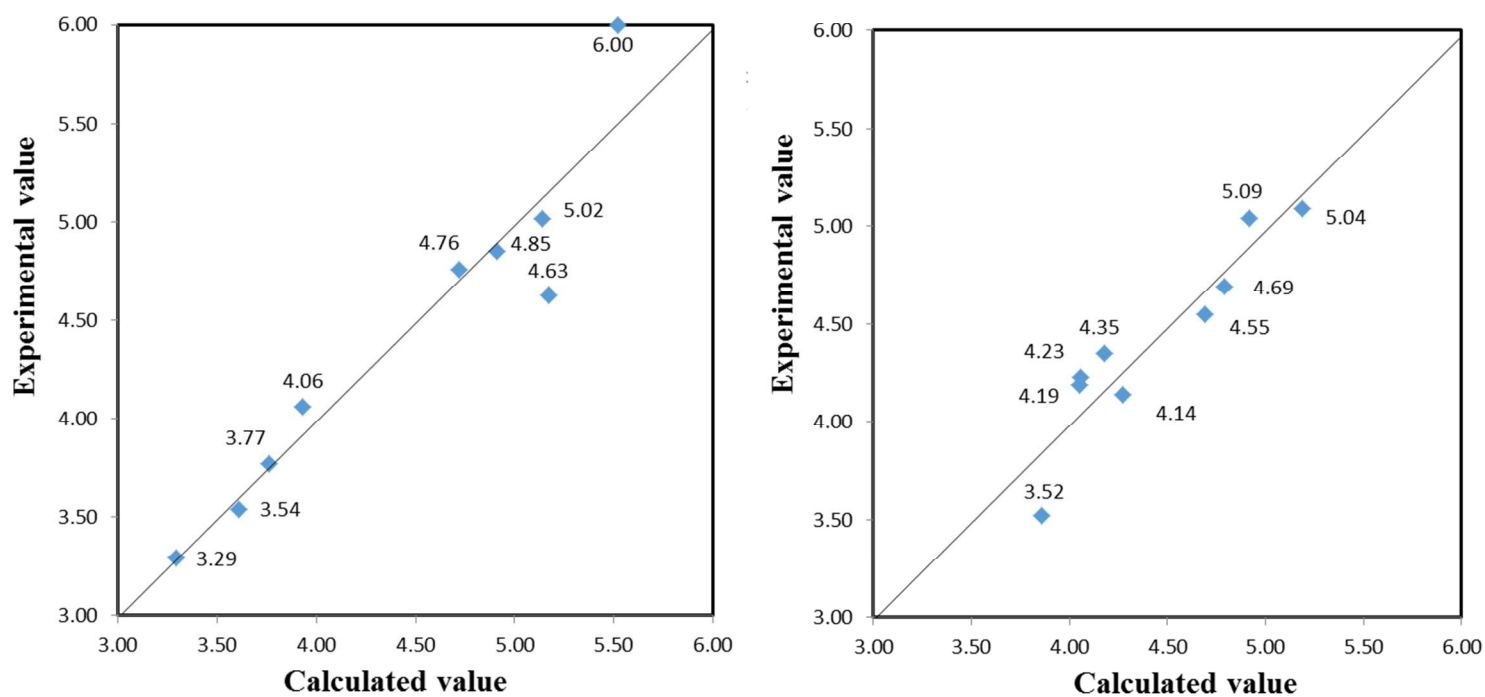

Figure S1: Plots showing experimental values vs. calculated values for M—ATP (left) and M—H-ATP (right) complexes.
